# Supplementary material
Source: Springer Nature journal article supplement (https://www.springermedizin.de/resource/supplementary/13054_2011_9874_MOESM2_ESM.pdf/9707090)

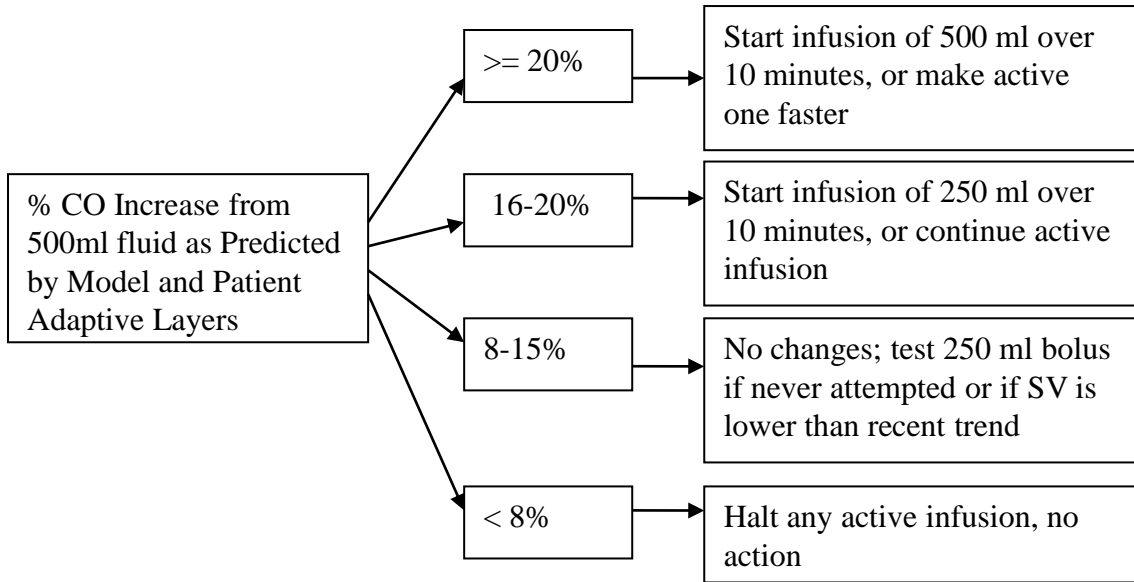

Supplement: MOESM2 [file 9707090]
